# Supplementary material for: Codonoblepharonteae, a New Major Lineage among Orthotrichoideae (Orthotrichaceae, Bryophyta)
Source: MDPI journal article supplement (doi:10.3390/plants11243557), 2022-12-16
Supplement: s1 [file s1]

**Table S1.** Samples information. Those in *italics* were newly sequenced for this study.

| Taxon                                                                         | ID      | Voucher    | Locality                          | Collector(s)             | <i>ITS2</i>     | <i>rps4</i>     | <i>trnG</i>     | <i>trnL-F</i>   |
|-------------------------------------------------------------------------------|---------|------------|-----------------------------------|--------------------------|-----------------|-----------------|-----------------|-----------------|
| <i>Atlantichella calvescens</i><br>(Carrington) F.Lara, Garilleti & Draper    | ID199   | MAUAM 4182 | Spain, Canary Islands             | F. Lara                  | MW264111        | MW401337        | MW401424        | MW401501        |
| <i>Atlantichella calvescens</i><br>(Carrington) F.Lara, Garilleti & Draper    | ID400   | MAUAM 4442 | Spain, Asturias                   | B. Estébanez             | MW264114        | MW401340        | MW401427        | MW401504        |
| <i>Australoria chilensis</i> (Calabrese & F. Lara) F.Lara, Garilleti & Draper | FL013   | MAUAM 3767 | Argentina, Neuquén                | F. Lara & R. Garilleti   | <i>OP508358</i> | <i>OP487613</i> | <i>OP487640</i> | <i>OP487660</i> |
| <i>Codonoblepharon forsteri</i><br>(Dicks.) Goffinet                          | ID384   | MAUAM 1950 | Spain, Álava                      | B. Albertos et al.       | MW264075        | MW401280        | MW401362        | MW401442        |
| <i>Codonoblepharon forsteri</i><br>(Dicks.) Goffinet                          | ID397   | MAUAM 4956 | Spain, Málaga                     | F. Lara                  | MN529593        | MN596378        | MN542450        | MN542426        |
| <i>Codonoblepharon forsteri</i><br>(Dicks.) Goffinet                          | PAR011  | MAUAM 3774 | Spain, Málaga                     | G. Terroba & J. Terroba  | -               | <i>OP487614</i> | <i>OP487641</i> | <i>OP487661</i> |
| <i>Codonoblepharon forsteri</i><br>(Dicks.) Goffinet                          | PAR018  | MAUAM 3778 | Spain, Málaga                     | G. Terroba               | <i>OP508359</i> | <i>OP487615</i> | <i>OP487642</i> | <i>OP487662</i> |
| <i>Codonoblepharon forsteri</i><br>(Dicks.) Goffinet                          | PAR020  | MAUAM 3780 | Spain, Málaga                     | G. Terroba               | <i>OP508360</i> | <i>OP487616</i> | <i>OP487643</i> | <i>OP487663</i> |
| <i>Codonoblepharon forsteri</i><br>(Dicks.) Goffinet                          | PAR023  | MAUAM 3782 | France, Hérault                   | V. Hugonnot              | <i>OP508361</i> | <i>OP487617</i> | <i>OP487644</i> | <i>OP487664</i> |
| <i>Codonoblepharon forsteri</i><br>(Dicks.) Goffinet                          | PAR024  | MAUAM 3783 | France, Cantal                    | V. Hugonnot              | <i>OP508362</i> | <i>OP487618</i> | <i>OP487645</i> | <i>OP487665</i> |
| <i>Codonoblepharon forsteri</i><br>(Dicks.) Goffinet                          | PAR025  | MAUAM 3784 | France, Corse                     | V. Hugonnot              | -               | <i>OP487619</i> | <i>OP487646</i> | <i>OP487666</i> |
| <i>Codonoblepharon menziesii</i><br>Schwägr.                                  | PAR026  | CAS 34885  | USA, California                   | J.R. Shevock             | -               | <i>OP487623</i> | -               | <i>OP487670</i> |
| <i>Codonoblepharon menziesii</i><br>Schwägr.                                  | PAR027  | CAS 33741  | USA, California                   | J.R. Shevock             | -               | <i>OP487624</i> | -               | <i>OP487671</i> |
| <i>Codonoblepharon menziesii</i><br>Schwägr.                                  | PAR028  | CAS 33550  | Australia, Southern Forest Region | J.R. Shevock & W.R. Buck | -               | <i>OP487625</i> | -               | <i>OP487672</i> |
| <i>Codonoblepharon menziesii</i><br>Schwägr.                                  | PAR002b | MAUAM 3395 | Australia, Macquarie Island       | L. Pertierra             | <i>OP508363</i> | <i>OP487620</i> | -               | <i>OP487667</i> |

|                                                                                     |                      |                                     |                                   |                         |          |          |          |          |
|-------------------------------------------------------------------------------------|----------------------|-------------------------------------|-----------------------------------|-------------------------|----------|----------|----------|----------|
| <i>Codonoblepharon menziesii</i> Schwägr.                                           | PAR003b              | MAUAM 2975                          | New Zealand, North Island         | F. Lara & E. San Miguel | -        | OP487621 | -        | OP487668 |
| <i>Codonoblepharon menziesii</i> Schwägr.                                           | PAR005               | MAUAM 3765                          | New Zealand, South Island         | F. Lara & R. Garilleti  | OP508364 | OP487622 | -        | OP487669 |
| <i>Codonoblepharon menziesii</i> Schwägr.                                           | 1603                 | BG 18773                            |                                   | Shevock                 | -        | MW401281 | MW401363 | MW401443 |
| <i>Codonoblepharon menziesii</i> var. <i>angustifolium</i> (Malta) Matcham & O'Shea | PAR037b              | MAUAM 3828                          | New Zealand, North Island         | F. Lara & R. Garilleti  | OP508365 | OP487626 | OP487647 | OP487673 |
| <i>Codonoblepharon minutum</i> (Müll.Hal. & Hampe) Matcham & O'Shea                 | PAR009               | MAUAM 3772                          | New Zealand, South Island         | F. Lara & R. Garilleti  | -        | OP487627 | -        | OP487674 |
| <i>Codonoblepharon minutum</i> (Müll.Hal. & Hampe) Matcham & O'Shea                 | PAR012               | MAUAM 3775                          | New Zealand, South Island         | F. Lara & R. Garilleti  | OP508366 | OP487628 | OP487648 | OP487675 |
| <i>Codonoblepharon pungens</i> (Müll.Hal.) A.Jaeger                                 | LaFarge-England 8097 | Herb. Goffinet LaFarge-England 8097 |                                   | LaFarge-England         | -        | AY618383 | -        | AY636005 |
| <i>Leratia obtusifolia</i> (Hook.) Goffinet                                         | 798                  | Allen 12284                         |                                   | Allen                   | MW264076 | MW401282 | MW401364 | MW401444 |
| <i>Lewinskya acuminata</i> (H.Philib.) F.Lara, Garilleti & Goffinet                 | BV010                | MAUAM 3272                          | Spain, Ávila                      | F. Lara                 | KT862263 | KT862293 | MN542451 | KT862322 |
| <i>Lewinskya incana</i> (Müll.Hal.) F.Lara, Garilleti & Goffinet                    | BV079                | MAUAM 4576                          | Chile, Capitan Prat               | J. Larraín              | MN529598 | MN177272 | MN542455 | MN542430 |
| <i>Lewinskya praemorsa</i> (Venturi) F.Lara, Garilleti & Goffinet                   | BV060                | MAUAM 4570                          | USA, Nevada                       | J.R.Shevock             | MW264088 | MN177265 | MW401377 | MW401456 |
| <i>Lewinskya shawii</i> (Wilson) F.Lara, Garilleti & Goffinet                       | BV068                | MAUAM 4587                          | Greece, Ipiros                    | F. Lara et al.          | MW264093 | MN177270 | MW401379 | MW401461 |
| <i>Lewinskya arborescens</i> (Thér. & Naveau) F.Lara, Garilleti & Goffinet          | BV070                | MAUAM 4590                          | Tanzania, Kilimanjaro             | F. Lara et al.          | MN529595 | MN177279 | MN542452 | MN542427 |
| <i>Macrocoma lycopodioides</i> (Schwägr.) Vitt                                      | BV024                | MAUAM 2953                          | South Africa, Western Cape        | F. Lara & E. San Miguel | KT804254 | KT862288 | KT804294 | KT804333 |
| <i>Nyholmiella gymnostoma</i> (Bruch ex Brid.) Holmen & E. Warncke                  | 1219                 | NY 4809                             | Canada, Newfoundland and Labrador | Zander                  | -        | MW401299 | MW401387 | MW401469 |
| <i>Nyholmiella obtusifolia</i> (Brid.) Holmen & E. Warncke                          | O118                 | MAUAM 4343                          | Spain, Burgos                     | F. Lara                 | MN529599 | JQ836797 | JQ836901 | JQ836986 |

|                                                                           |             |             |                                             |                                            |          |          |          |          |
|---------------------------------------------------------------------------|-------------|-------------|---------------------------------------------|--------------------------------------------|----------|----------|----------|----------|
| <i>Orthotrichum anomalum</i> Hedw.                                        | O120        | MAUAM 4330  | Spain, Asturias                             | B. Estébanez                               | MH275453 | JQ836799 | JQ836903 | JQ836988 |
| <i>Orthotrichum callistomum</i><br>Fisch.-Oost. ex Bruch &<br>Schimp.     | FL002       | MAUAM 3403  | Nepal, Sagarmatha<br>National Park          | F. Lara & I.<br>Draper                     | MT902367 | MW401300 | MW401389 | MW401470 |
| <i>Orthotrichum casasianum</i><br>F.Lara, Garilleti & Mazimpaka           | R398        | MAUAM 1702  | Spain, Álava                                | B. Albertos et al.                         | MN529600 | JQ836811 | JQ836915 | JQ837000 |
| <i>Orthotrichum confusum</i> R.<br>Medina, F.Lara & Garilleti             | R680        | MAUAM 4323  | USA, California                             | F. Lara et al.                             | MH275463 | JQ836878 | JQ836978 | JQ837067 |
| <i>Orthotrichum persimile</i> F.Lara,<br>R.Medina & Garilleti             | R580        | UC-1650645  | USA, California                             |                                            | MH275479 | JQ836833 | JQ836937 | JQ837022 |
| <i>Pentastichella chilensis</i><br>(Broth.) F.Lara, Garilleti &<br>Draper | FL020       | MAUAM 3787  | Chile, Elqui                                | P. Drapela                                 | OP508367 | OP487629 | OP487649 | OP487676 |
| <i>Pentastichella chilensis</i><br>(Broth.) F.Lara, Garilleti &<br>Draper | FL021       | JL 43034    | Chile, Choapa                               | J. Larraín                                 | OP508368 | OP487630 | OP487650 | OP487677 |
| <i>Pentastichella pentasticha</i><br>(Mont.) Müll.Hal. ex Thér.           | FL022       | MAUAM 3769  | Chile, Aysén                                | F. Lara & R.<br>Garilleti                  | OP508369 | OP487631 | OP487651 | OP487678 |
| <i>Pentastichella pentasticha</i><br>(Mont.) Müll.Hal. ex Thér.           | ID207/BV038 | MAUAM 2981  | Argentina,<br>Neuquén Villa La<br>Angostura | F. Lara & E. San<br>Miguel                 | KT862259 | KT862289 | KT804296 | KT804335 |
| <i>Plenogemma phyllantha</i> (Brid.)<br>Sawicki, Plášek & Ochyra          | ID331       | MAUAM 5189  | USA, Washington<br>National Park            | F. Lara, R.<br>Garilleti & B.<br>Albertos  | KT804291 | MW401330 | KT804330 | KT804370 |
| <i>Plenogemma phyllantha</i> (Brid.)<br>Sawicki, Plášek & Ochyra          | ID387       | MAUAM 2911  | United Kingdom,<br>England                  | F. Lara                                    | MW264106 | MW401332 | MW401418 | MW401497 |
| <i>Pulviger a lyellii</i> (Hook. &<br>Taylor) Plášek, Sawicki &<br>Ochyra | BV018       | MAUAM 4451  | USA, California                             | F. Lara, V.<br>Mazimpaka & B.<br>Vigalondo | KT862282 | KT862310 | MN542458 | KT862339 |
| <i>Pulviger a papillosa</i> (Hampe)<br>F.Lara, Draper & Garilleti         | ID409       | MAUAM 3477  | Canada, British<br>Columbia                 | F. Lara & R.<br>Garilleti                  | MN529620 | MN596395 | MN542474 | MN542446 |
| <i>Sehnemobryum paraguense</i><br>(Besch.) Lewinsky & Hedenäs             | 1516        | ALTA 21087  | Brazil                                      | Vitt                                       | MW264109 | AY618382 | MW401421 | AY636013 |
| <i>Stoneobryum bunyaense</i> D.H.<br>Norris & H.Rob.                      |             | US 00070599 | Australia,<br>Kiangaro Mt.                  |                                            | -        | QBX99061 | QBX99061 | QBX99061 |
| <i>Stoneobryum mirum</i><br>(Lewinsky) D.H.Norris & H.<br>Rob.            | 1506        | DUKE 156    | South Africa,<br>Eastern Cape               | Vanderpoorten                              | MW264110 | AY618381 | MW401422 | AY636012 |

|                                                                           |              |              |                              |                           |          |          |          |          |
|---------------------------------------------------------------------------|--------------|--------------|------------------------------|---------------------------|----------|----------|----------|----------|
| <i>Ulota coarctata</i> (P.Beauv.)<br>Hammar                               | ID360        | MAUAM 4438   | Spain, Cantabria             | F. Lara et al.            | KT804260 | MN596397 | KT804299 | KT804338 |
| <i>Ulota crispula</i> Bruch                                               | ID355        | MAUAM 4814   | Ireland, Wicklow             | B. Estébanez              | KT804275 | MN596398 | KT804314 | KT804353 |
| <i>Ulota drummondii</i> (Hook. &<br>Grev.) Brid.                          | ID356        | MAUAM 5188   | Japan, Hokkaido              | R. Garilleti & F.<br>Lara | KT804280 | MW401344 | KT804319 | KT804359 |
| <i>Ulota macrodontia</i> Dusén ex<br>Malta                                | RG025        | RG2016-236a  | Chile, Aysén                 | R. Garilleti & F.<br>Lara | MW264120 | MW401348 | MW401433 | MW401510 |
| <i>Ulota streptodon</i> Garilleti,<br>Mazimpaka & F.Lara                  | RG022        | RG2017-012e  | Chile, Aysén                 | R. Garilleti & F.<br>Lara | MW264124 | MW401357 | MW401437 | MW401514 |
| <i>Zygodon campylophyllus</i><br>Müll.Hal.                                | 1128         | DUKE 23100   |                              | Steere                    | MW264125 | MW401358 | -        | MW401515 |
| <i>Zygodon catarinói</i> C.A.Garcia,<br>F.Lara, Sérgio & Sim-Sim          | PAR015       | MAUAM 3385   | Spain, Ciudad<br>Real        | F. Lara                   | OP508370 | OP487632 | OP487652 | OP487679 |
| <i>Zygodon dentatus</i> (Limpr.)<br>Breidl. ex Gams                       | Zy1402       | Kucera 17011 | Czech Republic,<br>Debrník   |                           | MT921514 | MT926369 | -        | MT926279 |
| <i>Zygodon fragilifolius</i> Broth. ex<br>Malta                           | FL018        | MAUAM 3786   | Tanzania, Mt.<br>Kilimanjaro | F. Lara et al.            | OP508371 | OP487633 | OP487653 | OP487680 |
| <i>Zygodon hookeri</i> var.<br><i>leptobolax</i> (Müll.Hal.)<br>Calabrese | PAR007b      | MAUAM 3771   | New Zealand,<br>South Island | F. Lara & R.<br>Garilleti | OP508372 | OP487634 | OP487654 | OP487681 |
| <i>Zygodon intermedius</i> Bruch &<br>Schimp.                             | PAR014       | MAUAM 3777   | New Zealand,<br>South Island | F. Lara & R.<br>Garilleti | -        | OP487635 | OP487655 | OP487682 |
| <i>Zygodon peruvianus</i> Sull.                                           | 1131         | DUKE PV132   |                              | Griffin                   | MW264127 | MW401360 | MW401439 | MW401517 |
| <i>Zygodon rupestris</i> Schimp. ex<br>Lorentz                            | PAR017       | MAUAM 1893   | Spain, Cádiz                 | F. Lara                   | OP508373 | OP487636 | OP487656 | OP487683 |
| <i>Zygodon seriatus</i> Thér. &<br>Naveau                                 | FL016        | MAUAM 3785   | Kenya, Mt. Kenya             | J.A. Calleja et al.       | OP508374 | OP487637 | OP487657 | OP487684 |
| <i>Zygodon sibiricus</i> Ignatov,<br>Ignatova, Z.Iwats. & B.C.Tan         | 1183         | MHA 1/82     | Russia, Altai                | Ignatov                   | -        | MW401361 | MW401440 | MW401518 |
| <i>Zygodon stirtonii</i> Schimp.                                          | PAR022       | MAUAM 4521   | Spain, Cantabria             | B. Estébanez              | OP508375 | OP487638 | OP487658 | OP487685 |
| <i>Zygodon trichomitrius</i> Hook. &<br>Wilson                            | PAR016       | MAUAM 5000   | Ethiopia, Kaffa              | K. Hylander               | OP508376 | OP487639 | OP487659 | OP487686 |
| <i>Zygodon viridissimus</i> (Dicks.)<br>Brid.                             | ID208/BV0372 | MAUAM 2910   | United Kingdom,<br>England   | F. Lara                   | KT804258 | KT862290 | MW401441 | KT862319 |
